# Supplementary material
Source: ML conference proceedings conference paper supplement (https://proceedings.mlr.press/v32/brunskill14.html)
Supplement: Supplementary file 1 [file brunskill14-supp.pdf]

## 9. Further Details for Section 3

### 9.1. Proof Sketch of Theorem 1

The proof parallels the proof of Proposition 1 by [Strehl et al. \(2006\)](#) for MDPs, except the horizon (denoted by  $T$  in their paper) needs to be redefined:

$$H = \frac{1}{1-\gamma} \ln \frac{4}{\epsilon(1-\gamma)} + L + \frac{1}{\sqrt{C}} \ln \frac{2}{\delta'}.$$

This choice of  $H$  ensures that, for any epoch  $t$ , the non-stationary policy  $\mathbf{A}_t$  in state  $s_t$  is either  $\Theta(\epsilon)$ -optimal, or will reach an unknown state in  $H$  steps with probability at least  $\epsilon(1-\gamma)$ . In either case, the algorithm will reach a next state between step  $\frac{1}{1-\gamma} \ln \frac{4}{\epsilon(1-\gamma)}$  and  $H$ , since with probability at least  $1-\delta'$ , the waiting time of taking action  $a_t$  in state  $s_t$  is  $L + \frac{1}{\sqrt{C}} \ln \frac{1}{\delta'}$  (Lemma 1). Taking a union bound over all possible non- $\epsilon$ -optimal steps (which is polynomial in  $\zeta$ ,  $1/\epsilon$ ,  $1/\delta$ , and  $1/(1-\gamma)$ ), that is, setting  $\delta'$  to  $\delta/\text{poly}(\zeta, 1/\epsilon, 1/\delta, 1/(1-\gamma))$ , we can prove the theorem as done in [Strehl et al. \(2006\)](#). Note that we need not take a union over all epochs, but only those where the decision is potentially non- $\epsilon$ -optimal; if  $\mathbf{A}_t$  is  $\epsilon$ -optimal in epoch  $t$ , it does not count towards the sample complexity anyway.

### 9.2. Definition of Known-state SMDP

**Definition 3** Let  $M = \langle \mathcal{S}, \mathcal{A}, P, R, \gamma \rangle$  be an SMDP,  $Q$  is a state–action value function, and  $\mathcal{K} \subseteq \mathcal{S} \times \mathcal{A}$  a set of “known” state–actions. Define the known state–action SMDP (with respect to  $\mathcal{K}$ ) as  $M_{\mathcal{K}} = \langle \mathcal{S}, \mathcal{A}, P_{\mathcal{K}}, R_{\mathcal{K}}, \gamma \rangle$ , where

$$P_{\mathcal{K}}(s', \tau | s, a) = \begin{cases} P(s', \tau | s, a), & \text{if } (s, a) \in \mathcal{K} \\ \mathbb{I}(s = s', \tau = 1), & \text{otherwise} \end{cases}$$

$$R_{\mathcal{K}}(s, a) = \begin{cases} R(s, a), & \text{if } (s, a) \in \mathcal{K} \\ (1-\gamma)Q(s, a), & \text{otherwise.} \end{cases}$$

In other words, the known state–action SMDP  $M_{\mathcal{K}}$  has identical dynamics to  $M$  except in unknown state–actions where (i) the transitions are all self-loops with unit waiting time, and (ii) the  $Q$ -values are exact.

### 9.3. Proof of Theorem 2

Clearly, the construction leads to optimistic value functions, so the first condition of Theorem 1 holds.

We now consider when a state–action pair  $(s, a)$  becomes known. Define the *effective* transition probabilities by

$$P^S(s' | s, a) = \sum_{\tau} P(s', \tau | s, a) \gamma^{\tau},$$

and the marginal distribution of waiting time by

$$P^T(\tau | s, a) = \sum_{s'} P(s', \tau | s, a).$$

We first generalize the simulation lemma (see, e.g., [Kearns & Singh \(2002\)](#); [Strehl et al. \(2009\)](#)) for MDPs to SMDPs, giving a bound on the value function differences in terms of model estimation errors:

**Lemma 5** Let  $M_i = \langle \mathcal{S}, \mathcal{A}, P_i, R_i, \gamma \rangle$  ( $i = 1, 2$ ) be two SMDPs that differ only in reward and transition functions, and  $V_i^*$  and  $Q_i^*$  the respective optimal value functions. Let  $\bar{\gamma}_{s,a}$  be the effective discount factor for  $(s, a)$  under  $M_2$ :

$$\bar{\gamma}_{s,a} = \sum_{\tau} \gamma^{\tau} P_2^T(\tau | s, a).$$

and define the discount-adjusted model estimation error by

$$\varepsilon_{s,a} = \frac{1}{1-\bar{\gamma}_{s,a}} (|R_1(s, a) - R_2(s, a)| + V_{\max} \|P_1^S(\cdot | s, a) - P_2^S(\cdot | s, a)\|_1).$$

Then, for any  $s$  and  $a$ ,

$$|Q_1^*(s, a) - Q_2^*(s, a)| \leq \max_{s,a} \varepsilon_{s,a}$$

$$|V_1^*(s, a) - V_2^*(s, a)| \leq \max_{s,a} \varepsilon_{s,a}$$

**Proof** Let  $(s, a)$  be the state–action pair that achieves maximum difference of  $|Q_1^*(\cdot, \cdot) - Q_2^*(\cdot, \cdot)|$ . To simplify notation, define

$$\varepsilon_R = |R_1(s, a) - R_2(s, a)|$$

$$\varepsilon_P = \|P_1^S(\cdot | s, a) - P_2^S(\cdot | s, a)\|_1$$

$$\Delta = |Q_1^*(s, a) - Q_2^*(s, a)|$$

Then,

$$\begin{aligned}
 \Delta &= |Q_1^*(s, a) - Q_2^*(s, a)| \\
 &= \left| \left( R_1(s, a) + \sum_{s', \tau} \gamma^\tau P_1(s', \tau | s, a) V_1^*(s') \right) \right. \\
 &\quad \left. - \left( R_2(s, a) + \sum_{s', \tau} \gamma^\tau P_2(s', \tau | s, a) V_2^*(s') \right) \right| \\
 &\leq |R_1(s, a) - R_2(s, a)| \\
 &\quad + \left| \sum_{s', \tau} \gamma^\tau (P_1(s', \tau | s, a) - P_2(s', \tau | s, a)) V_1^*(s') \right| \\
 &\quad + \left| \sum_{s', \tau} \gamma^\tau P_2(s', \tau | s, a) (V_1^*(s') - V_2^*(s')) \right| \\
 &\leq \varepsilon_R + V_{\max} \varepsilon_P + \Delta \left| \sum_{s', \tau} \gamma^\tau P_2(s', \tau | s, a) \right| \\
 &= (\varepsilon_R + V_{\max} \varepsilon_P) + \bar{\gamma}_{s, a} \Delta \\
 &= (1 - \bar{\gamma}_{s, a}) \varepsilon_{s, a} + \bar{\gamma}_{s, a} \Delta.
 \end{aligned}$$

Rearranging terms, we have

$$\Delta \leq \varepsilon_{s, a} \leq \max_{s', a'} \varepsilon_{s', a'}.$$

The case for  $V^*$  follows immediately from the following observation: for any state  $s$ ,

$$\begin{aligned}
 |V_1^*(s) - V_2^*(s)| &= \left| \max_a Q_1^*(s, a) - \max_a Q_2^*(s, a) \right| \\
 &\leq \max_a |Q_1(s, a) - Q_2(s, a)| \leq \Delta.
 \end{aligned}$$

□

Clearly,  $R(s, a) \in [0, \frac{1}{1-\gamma}]$ . Using a concentration argument based on Hoeffding's inequality, one can establish that  $\mathcal{O}(1/(\varepsilon^2(1-\gamma)^2))$  samples suffice to ensure  $\varepsilon$  accuracy in the reward estimate. Similarly, the effective transition probabilities  $P(s'|s, a)$  can also be estimated within  $\varepsilon$  total variation with  $\mathcal{O}(N_{sa}/\varepsilon^2)$  samples. Therefore, by setting  $\varepsilon$  appropriately, the accuracy condition in Theorem 1 can be satisfied.

Finally, there are at most  $SA$  many state–actions, each becoming known when it is visited sufficiently often. The bounded-surprises condition in Theorem 1 thus holds.

Therefore all three conditions of Theorem 1 hold, and the result follows.

## 10. Further Details for Section 4

### 10.1. Proof Sketch of Lemma 3

Fix a non- $\varepsilon$ -optimal option set  $\mathcal{O}' \subset \mathcal{O}^*$  with  $|\mathcal{O}'| \leq \bar{O}$ . By assumption, it fails to represent a near-optimal policy for MDPs drawn i.i.d. from  $\nu$  over  $\mathcal{M}$ . Following the same argument for Lemma 1 of Brunskill & Li (2013),  $p_{\min}^{-1} \ln \frac{C}{\delta}$  many tasks suffices to reveal the non- $\varepsilon$ -optimality of  $\mathcal{O}'$ , with probability at least  $1 - \delta/C$ . Taking a union bound over all  $C$  subsets of  $\mathcal{O}^*$  up to size  $\bar{O}$ , one finishes the proof of the lemma.

### 10.2. Proof Sketch of Lemma 4

For convenience, define  $\varepsilon_1 = (\varepsilon - \varepsilon)/4$ . The proof relies on three major steps, each holding with probability at least  $1 - \delta$ .

- *The MDP models are all estimated to sufficient accuracy:* The condition together with Lemma 2 implies every state–action will be visited at least  $\Omega(NV_{\max}^2 \varepsilon_1^{-2} (1-\gamma)^{-2} \ln 1/\delta)$  times. Applying Hoeffding's inequality together with Lemma 8.5.5 of Kakade (2003), the reward and transition probabilities of every state–action pair are estimated with  $\varepsilon_1(1-\gamma)/V_{\max}$  accuracy. By the simulation lemma (c.f., Kearns & Singh (2002); Strehl et al. (2009)),  $|V_M^*(s) - V_{\hat{M}}^*(s)| < \varepsilon_1$ , and similarly,  $|V_{M'}^*(s) - V_{\hat{M}'}^*(s)| < \varepsilon_1$ , where  $M$  and  $\hat{M}$  are the underlying/estimated MDPs, and  $M'$  and  $\hat{M}'$  the corresponding SMDPs induced by the discovered option set  $\hat{\mathcal{O}}$ .
- *The discovered option set  $\hat{\mathcal{O}}$  is  $\varepsilon$ -optimal for all MDPs in  $\mathcal{M}$ :* Using the triangle inequality together with the two inequalities established in the previous step, we have

$$\begin{aligned}
 V_M^*(s) - V_{M'}^*(s) &\leq |V_M^*(s) - V_{\hat{M}}^*(s)| + |V_{\hat{M}}^*(s) - V_{\hat{M}'}^*(s)| \\
 &\quad + |V_{\hat{M}'}^*(s) - V_{M'}^*(s)| \\
 &\leq 2\varepsilon_1 + |V_{\hat{M}}^*(s) - V_{\hat{M}'}^*(s)|.
 \end{aligned}$$

In the option-discovery step,  $\hat{\mathcal{O}}$  must satisfy  $V_{\hat{M}}^*(s) - V_{\hat{M}'}^*(s) \leq (\varepsilon + \varepsilon)/2$ . Therefore,  $V_M^*(s) - V_{M'}^*(s) \leq 2\varepsilon_1 + (\varepsilon + \varepsilon)/2 = \varepsilon$ ; that is, the option set  $\hat{\mathcal{O}}$  is  $\varepsilon$ -optimal for all MDPs encountered in phase 1. According to Lemma 3,  $\hat{\mathcal{O}}$  must also be  $\varepsilon$ -optimal for all MDPs in  $\mathcal{M}$ ; otherwise, it will fail to represent  $\varepsilon$ -optimal policies in at least one MDP in phase 1.

- *There exists at least one option set that satisfies the criterion of Equation 2:* According to the assumption, there exists some option set  $\bar{\mathcal{O}}$  that is  $\varepsilon$ -optimal for  $\mathcal{M}$ : for any  $M$  and any  $s$ ,  $V_M^*(s) - V_{\bar{M}'}^*(s) < \varepsilon$ , where

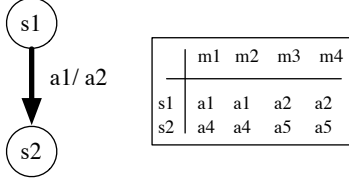

Figure 1. Example for sample complexity calculation illustration. The table shows the  $\epsilon$ -optimal actions for each MDP. There are 5 actions but  $a_3$  is never optimal for any MDP.

$M'$  is the SMDP induced by  $M$  and  $\bar{O}$ . Using the triangle inequality as well as the accuracy guarantee established in step 1, one gets

$$\begin{aligned}
 V_M^*(s) - V_{M'}^*(s) &< V_M^*(s) + \epsilon_1 - V_{M'}^*(s) + \epsilon_1 \\
 &< \epsilon + 2\epsilon_1 \\
 &= (\epsilon + \epsilon)/2.
 \end{aligned}$$

In other words,  $\bar{O}$  will satisfy Equation 2.

The overall failure probability is at most  $\delta$ : All three steps above hold with high probability. The first two steps require a union bound over all possible subsets of  $\mathcal{O}^*$  with size up to  $\bar{O}$ . There are  $C = \mathbb{O}\left((\mathcal{O}^*)^{\bar{O}}\right)$  many such subsets. It suffices to set  $\delta \leftarrow \delta/C$  for the union bound to complete the whole proof.

### 10.3. Proof of Theorem 3

The sample complexity can be divided into two terms, corresponding to tasks in phase 1 and in phase 2, respectively. The sample complexity of the MDP tasks in phase 1 is simply the number of tasks in phase 1,  $T_1$ , multiplied by the sample complexity of the  $E^3$  algorithm.

## 11. Further Details for Section 5

We now illustrate the process of evaluating the bound on the sample complexity benefit with the small example shown in Figure 1. In this example there are 2 states and 4 MDPs, and each MDP has a single  $\epsilon$ -optimal action in each state, shown in the Figure's table. Assume that state  $s_1$  deterministically transitions to  $s_2$ . Before introducing an option, there were 4 state-action combinations  $(s_1, a_1), (s_1, a_2), (s_2, a_4), (s_2, a_5)$  needed to cover the  $\epsilon$ -optimal policies of each MDP, resulting in a sample complexity bound of  $\mathbb{O}\left(\frac{4}{(1-\gamma)^6}\right)$ . Now consider adding the option whose initiation state is  $s_1$  and that takes action  $a_2$  in state  $s_1$  and action  $a_5$  in state  $s_2$ . The length of this option is always 2, so from the prior section the option's contribution to the sample complexity is  $\mathbb{O}\left(\frac{1}{(1-\gamma^2)^2(1-\gamma)^3}\left(2 + \frac{1}{1-\gamma}\right)\right)$ . This option covers MDPs  $m_3$  and  $m_4$ . To cover  $s_1$  and  $s_2$  for the remaining uncov-

ered MDPs requires just 2 primitive state-action pairs, with a resulting  $\mathbb{O}\left(\frac{2}{(1-\gamma)^6}\right)$  contribution to the sample complexity bound. Therefore, introducing the option will reduce this upper bound on the sample complexity if

$$\begin{aligned}
 \frac{1}{(1-\gamma^2)^2(1-\gamma)^3}\left(2 + \frac{1}{1-\gamma}\right) + \frac{2}{(1-\gamma)^6} &< \frac{4}{(1-\gamma)^6} \\
 \Leftrightarrow 5 &< 6\gamma + \gamma^2
 \end{aligned}$$

which holds for large  $\gamma$ , such as  $\gamma = 0.9$ . The algorithm evaluates this expression for the input  $\gamma$ , and keeps the option if the expression holds.
